# Supplementary material
Source: PubMed Central journal article supplement (PMC5101183)
Supplement: NIHMS814877-supplement-1.pdf [file NIHMS814877-supplement-1.pdf]

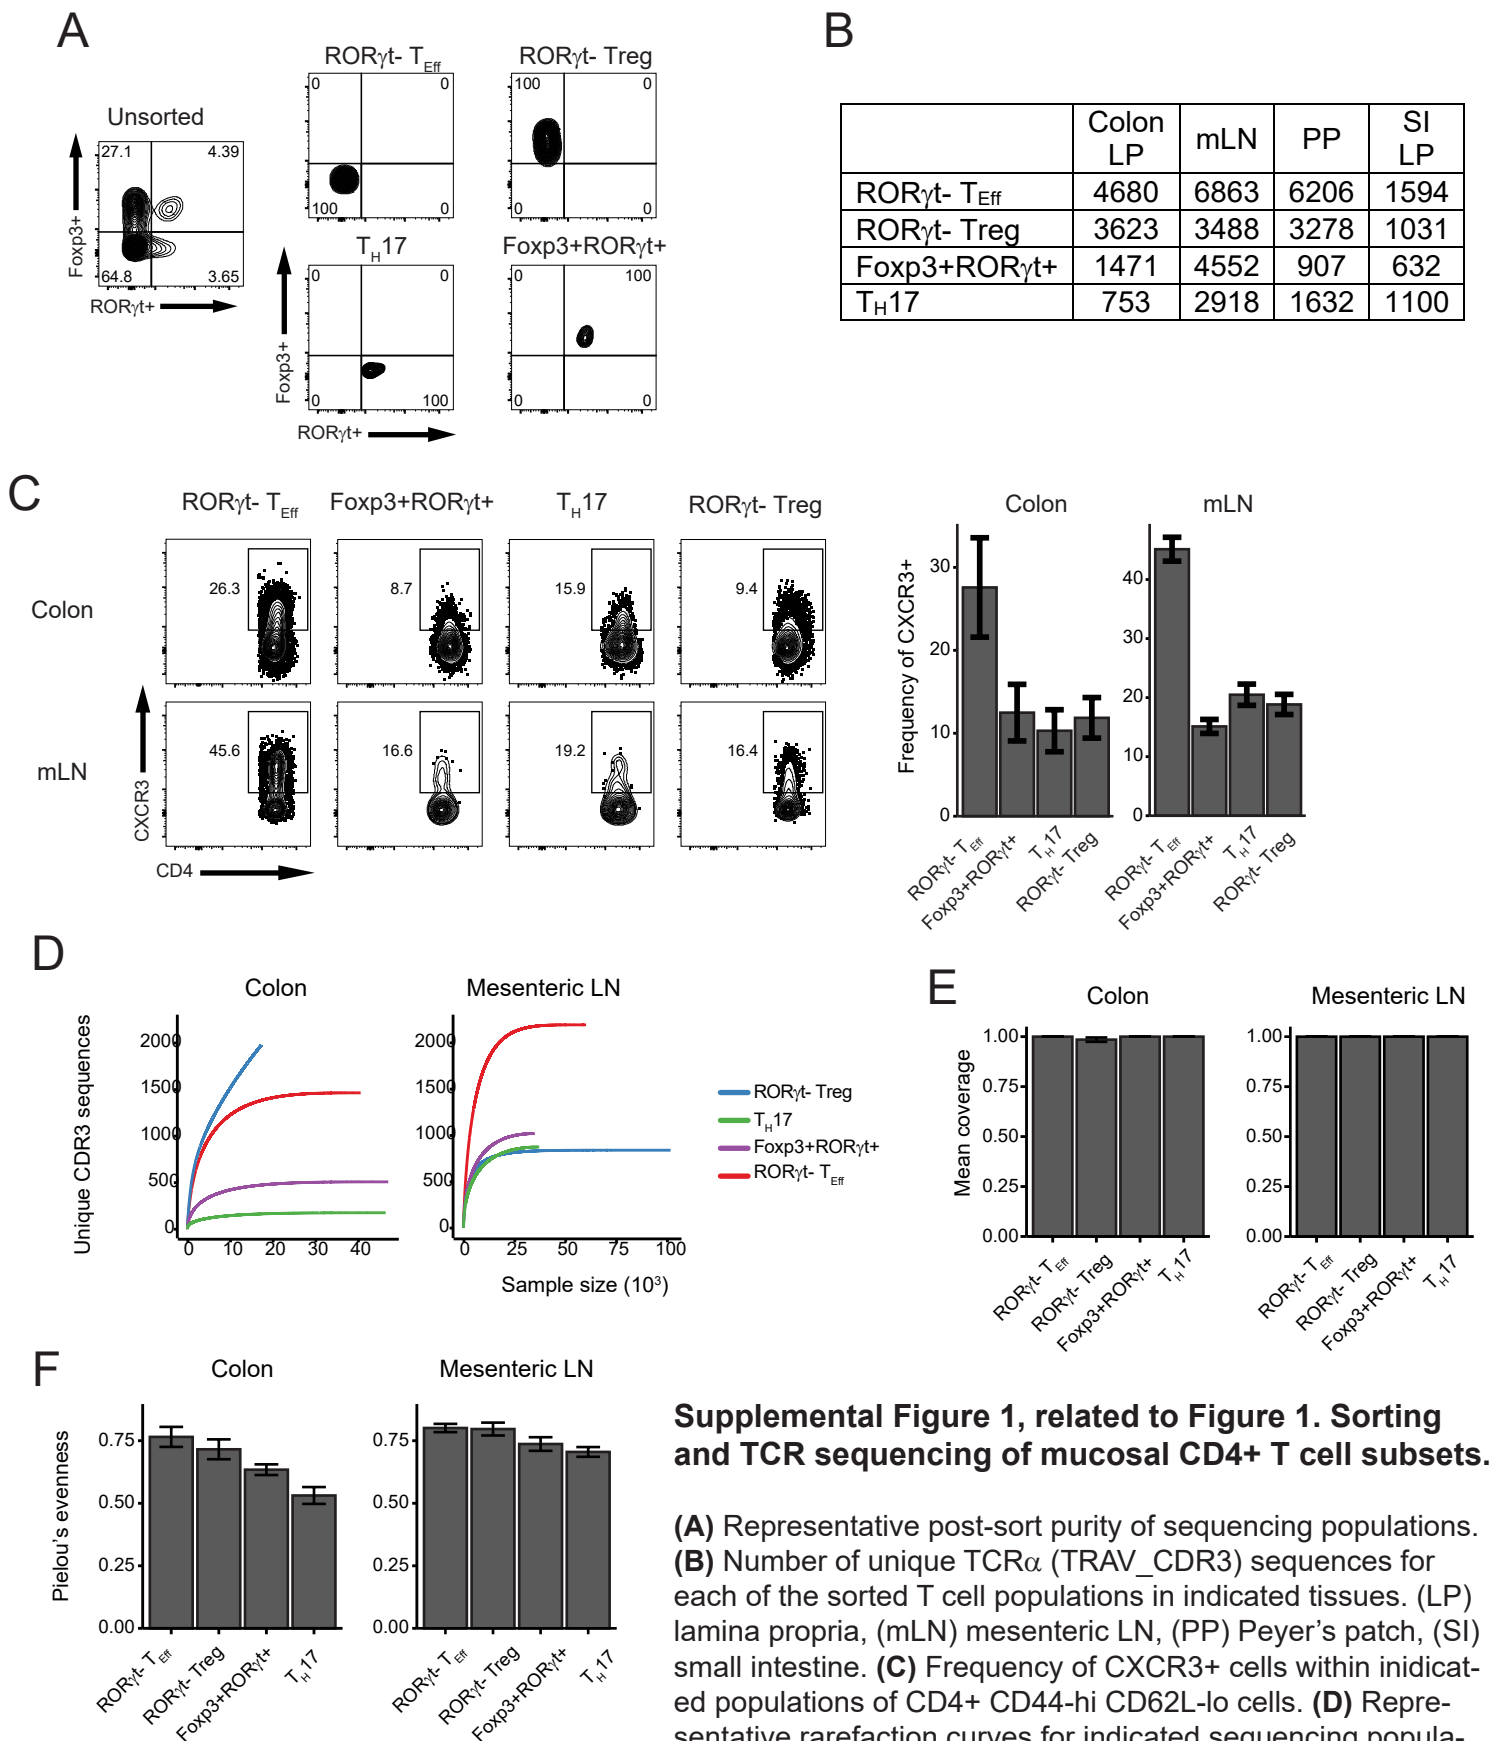

**Supplemental Figure 1, related to Figure 1. Sorting and TCR sequencing of mucosal CD4<sup>+</sup> T cell subsets.**

(A) Representative post-sort purity of sequencing populations. (B) Number of unique TCR $\alpha$  (TRAV\_CDR3) sequences for each of the sorted T cell populations in indicated tissues. (LP) lamina propria, (mLN) mesenteric LN, (PP) Peyer's patch, (SI) small intestine. (C) Frequency of CXCR3<sup>+</sup> cells within indicated populations of CD4<sup>+</sup> CD44<sup>hi</sup> CD62L<sup>lo</sup> cells. (D) Representative rarefaction curves for indicated sequencing populations. (E) Mean of calculated population coverage across all sequencing experiments for indicated populations and tissues. (F) Polyclonality indicated by average Pielou's evenness (evenness at order = 1) for each population in indicated tissues. n=6, each of 2 pooled mice. Error bars/ribbon =  $\pm$  1 s.e.m.

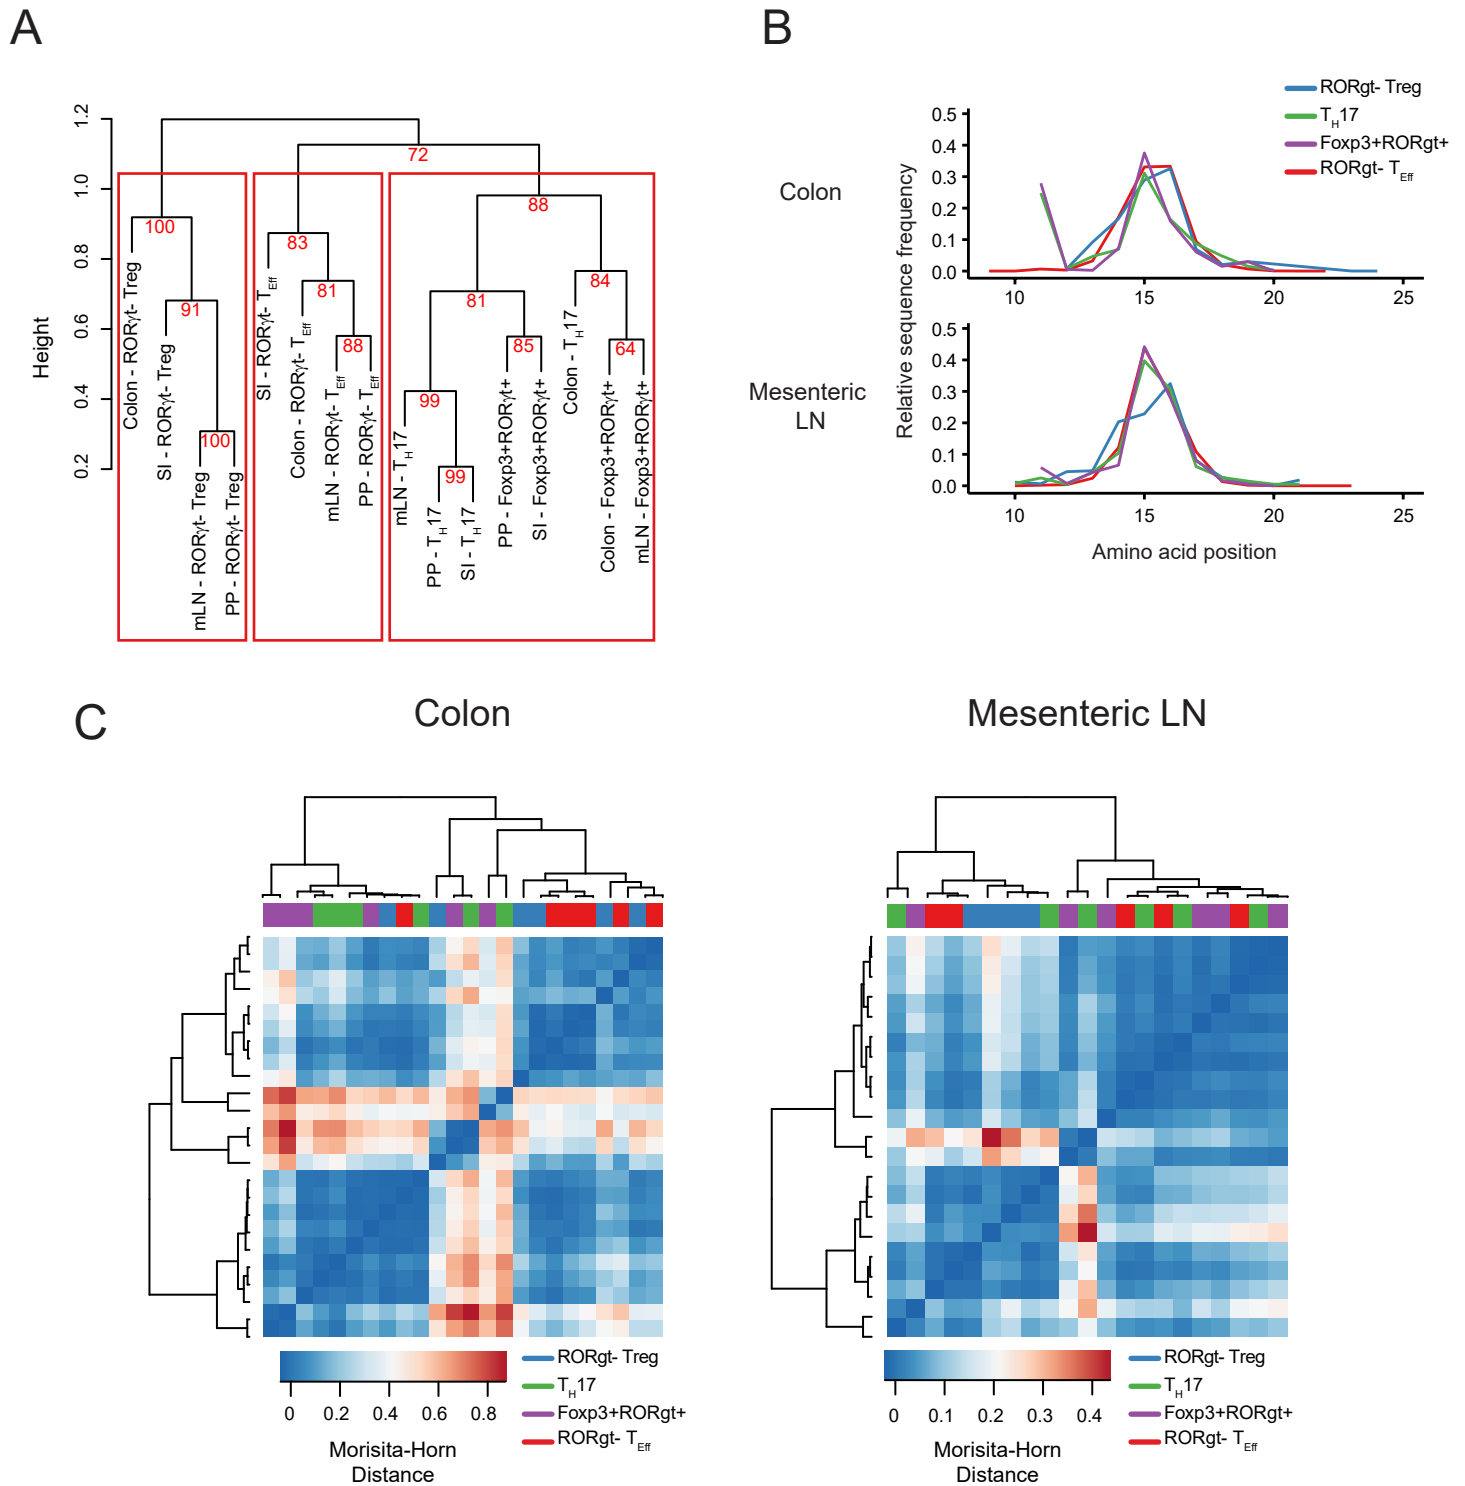

### Supplemental Figure 2, related to Figure 2. Clustering of mucosal TCR repertoire based on CDR3 similarity

**(A)** Hierarchical clustering of all sequenced populations and tissues based on Euclidean distance of combined set of Morisita-Horn values from each mouse for a given population and tissue. Node value indicates reproducibility of branch point in bootstrapped trees. **(B)** Spectratype analysis of TCRs from sorted populations. Lines represent mean frequency of indicated sequence length for each population. **(C)** Hierarchical clustering of TCR perturbation calculated from MH distance (inverse of MH similarity with 0=identical, 1=complete dissimilarity) of spectratype profiles (set of relative frequency for each sequence length) between individual sequencing samples of indicated populations and tissues. n=6, each of 2 pooled mice.

| TCR                                    | Average TCR frequency            |                      |                       |                   | Foxp3+ROR $\gamma$ t+ vs. ROR $\gamma$ t- Treg |         | Foxp3+ROR $\gamma$ t+ vs. T <sub>H</sub> 17 |         |
|----------------------------------------|----------------------------------|----------------------|-----------------------|-------------------|------------------------------------------------|---------|---------------------------------------------|---------|
|                                        | ROR $\gamma$ t- T <sub>Eff</sub> | ROR $\gamma$ t- Treg | Foxp3+ROR $\gamma$ t+ | T <sub>H</sub> 17 | log <sub>2</sub> fold                          | P-adj   | log <sub>2</sub> fold                       | P-adj   |
| <b>Colon</b>                           |                                  |                      |                       |                   |                                                |         |                                             |         |
| <b>TRAV14-3*01_ FCAASAIWNTGYQNFYFG</b> | 1.2E-04                          | 2.2E-03              | 3.9E-02               | 5.3E-04           | 3.186                                          | 6.5E-02 | 3.47                                        | 4.1E-02 |
| TRAV14-2*02_ FCAAMGYQNFYFG             | 3.3E-05                          | 0                    | 4.6E-03               | 0.0E+00           | 4.960                                          | 4.4E-04 | 2.58                                        | 9.9E-02 |
| TRAV14-2*02_ FCAASWASGYNKLTFG          | 1.9E-03                          | 2.9E-04              | 4.5E-03               | 1.5E-04           | 2.798                                          | 8.8E-02 | 2.48                                        | 9.9E-02 |
| TRAV14-2*02_ FCAASVTGNTGKLIFG          | 4.0E-04                          | 1.4E-05              | 3.3E-03               | 1.0E-04           | 4.897                                          | 4.0E-04 | 3.55                                        | 4.0E-02 |
| TRAV14D-3/DV8*01_ FCAASEYSALGRLHFG     | 6.6E-05                          | 0                    | 1.8E-03               | 0                 | 4.755                                          | 4.0E-04 | 7.00                                        | 1.4E-06 |
| TRAV14D-3/DV8*01_ FCAASDGNYAQGLTFG     | 2.5E-04                          | 1.7E-05              | 2.3E-04               | 0                 | 1.775                                          | 8.8E-02 | 2.93                                        | 4.9E-02 |
| TRAV14-2*02_ FCAASWASGDNKLTFG          | 4.9E-05                          | 9.5E-06              | 1.2E-04               | 0                 | 1.928                                          | 8.8E-02 | 2.64                                        | 5.7E-02 |
| TRAV14-2*02_ FCAAMGDQNFYFG             | 0                                | 0                    | 1.1E-04               | 0                 | 2.198                                          | 8.8E-02 | 2.04                                        | 9.9E-02 |
| TRAV14-3*01_ FCAASGYNQGLIFG            | 0                                | 0                    | 1.0E-04               | 0                 | 2.060                                          | 8.8E-02 | 3.66                                        | 1.5E-02 |
| TRAV14-1*01_ FCAASYNNAKLTFG            | 0                                | 0                    | 7.8E-05               | 0                 | 1.874                                          | 8.8E-02 | 2.02                                        | 9.9E-02 |
| <b>Mesenteric LN</b>                   |                                  |                      |                       |                   |                                                |         |                                             |         |
| <b>TRAV14-3*01_ FCAASAIWNTGYQNFYFG</b> | 4.9E-04                          | 1.9E-04              | 9.7E-03               | 1.1E-03           | 4.00                                           | 2.3E-02 | 3.47                                        | 4.1E-02 |
| TRAV14D-3/DV8*02_ FCAASYNNAKLTFG       | 0                                | 0                    | 6.9E-03               | 1.2E-04           | 5.34                                           | 2.7E-03 | 4.95                                        | 3.5E-03 |
| TRAV14-2*02_ FCAAMGYQNFYFG             | 1.1E-04                          | 0                    | 1.3E-03               | 6.0E-04           | 4.09                                           | 1.8E-02 | 2.58                                        | 9.9E-02 |
| TRAV14D-3/DV8*02_ FCAAGANTGKLTFG       | 1.3E-04                          | 0                    | 8.4E-04               | 2.1E-04           | 4.19                                           | 1.5E-02 | 3.26                                        | 5.8E-02 |
| TRAV14D-3/DV8*03_ FCAASASSGSWQLIFG     | 2.7E-04                          | 0                    | 7.4E-04               | 1.2E-04           | 3.75                                           | 2.7E-02 | 2.17                                        | 9.9E-02 |
| TRAV14-1*01_ FCAASWASGYNKLTFG          | 6.4E-05                          | 3.8E-05              | 5.4E-04               | 1.0E-04           | 2.88                                           | 7.2E-02 | 2.01                                        | 9.9E-02 |
| TRAV14D-3/DV8*03_ FCAASEYSALGRLHFG     | 0                                | 4.4E-05              | 5.3E-04               | 0.0E+00           | 2.66                                           | 9.7E-02 | 5.18                                        | 1.0E-03 |
| TRAV14D-3/DV8*02_ FCAASRGGSAKLIFG      | 0                                | 0                    | 4.6E-04               | 0.0E+00           | 4.11                                           | 1.8E-02 | 4.36                                        | 5.3E-03 |
| TRAV14-2*02_ FCAASDGSNYQLIWG           | 2.7E-05                          | 0                    | 3.2E-04               | 0.0E+00           | 3.21                                           | 4.6E-02 | 3.33                                        | 2.4E-02 |

### Supplemental Table I, related to Figure 3. Top Foxp3+ROR $\gamma$ t+ TCR $\alpha$ sequences

Top 10 Foxp3+ROR $\gamma$ t+ TCR $\alpha$  sequences from indicated tissues, sorted by frequency, meeting criteria of  $\geq 1$  log<sub>2</sub>fold enrichment and  $\geq 0.1$  false discovery rate adjusted p-value for comparison with both the ROR $\gamma$ t- Treg and T<sub>H</sub>17 populations, calculated by DESeq2. Bold indicates CT2 sequence

| Primer                                                            | Sequence                                                   |
|-------------------------------------------------------------------|------------------------------------------------------------|
| 1 <sup>st</sup> -PCR Forward Va2 primer                           | CTTCCGATCATGGACAAGATCCTGACAGC                              |
| 1 <sup>st</sup> and 2 <sup>nd</sup> PCR Reverse Ca-adaptor primer | CAAGCAGAAGACGGCATAACGAGATtcgtacgagacgacacagcaggttctgggtctg |
| 2 <sup>nd</sup> PCR Forward adaptor primer                        | AATGATACGGCGACCACCGAGATCTACACCTTCCGATC                     |
| Forward Va2 sequencing primer                                     | ACACCTTCCGATCatggacaagatcctgacagc                          |
| Reverse Ca2 sequencing primer                                     | gacgacacagcaggttctgggttctggatgt                            |
| Forward index sequencing primer                                   | cagaaccagaacctgctgtgt                                      |

**Supplemental Table II, related to TCR Sequencing Experimental Procedure. Sequence of primers used for amplification and sequencing of TRAV14 TCR library for use with the Illumina MiSeq platform.**
